# Supplementary material
Source: bioRxiv or medRxiv preprint supplement (https://www.medrxiv.org/highwire/filestream/70757/field_highwire_adjunct_files/0/2019.12.16.19015040-1.pdf)
Supplement: Supplementary file [file 2019.12.16.19015040-1.pdf]

**Blood pressure and cognitive function across the eighth decade: a prospective study of the Lothian Birth Cohort of 1936**

**Supplementary Materials**

Supplementary Figures 1, 2

Supplementary Tables 1 – 3

**Supplementary Figure 1. Simplified path diagram of the hierarchical curve of factors latent growth model of blood pressure change in the LBC1936.** Circles represent latent variables and squares represent measured variables. Growth curves, including latent level, linear slope, and quadratic slope factors, were estimated from both systolic and diastolic reading. Basis coefficients (loadings on the individual test slopes) were fixed at 0, 2.96, 6.72, and 9.79 for the linear slopes and 0, 8.76, 45.16, and 95.84 for the quadratic slopes to precisely reflect the amount of time passing between assessments. Dashed lines indicate the relationships between covariates which differed between waves and their effects on the individual measurements at different waves. To preserve interpretability, not all variables and paths are shown. Solid, double arrowed lines indicate correlations between latent variables. Dashed lines ending in diamonds represent systolic and diastolic measurements, modelled the same way as at age 70.

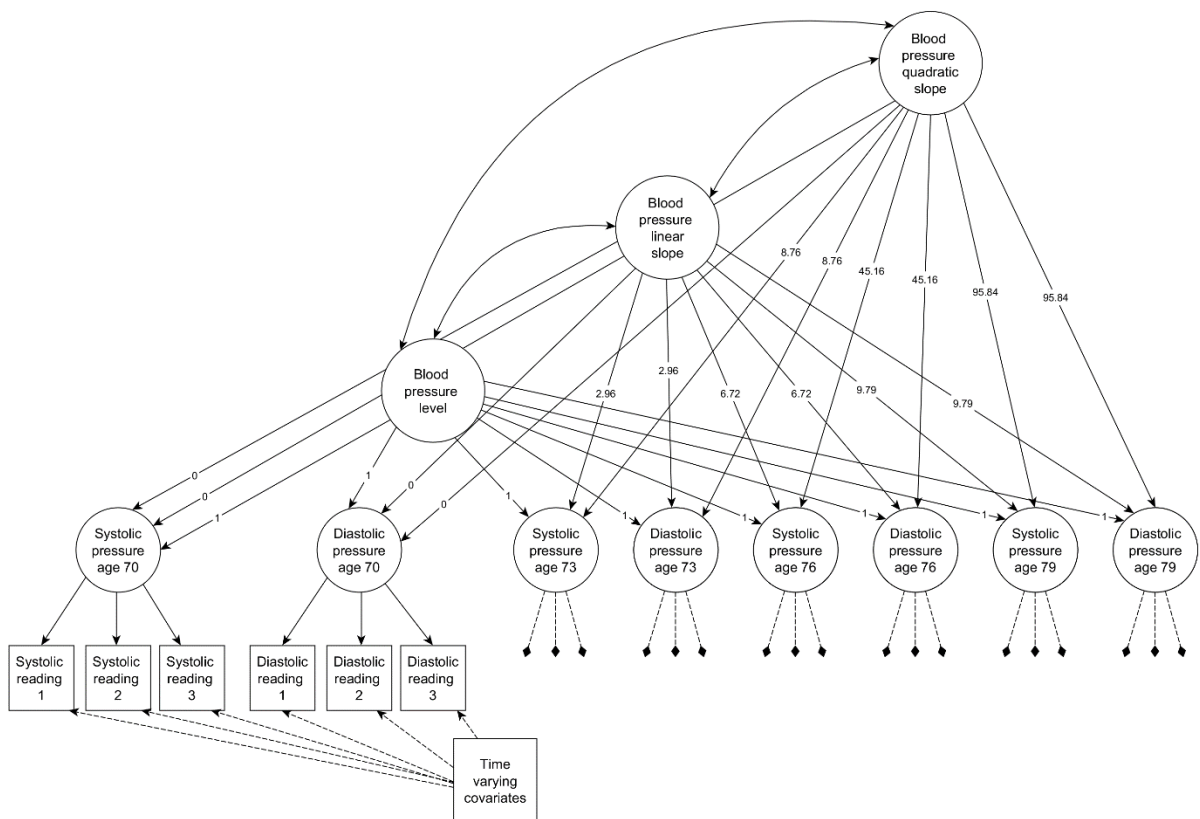

**Supplementary Figure 2. Simplified path diagram of the bivariate growth curves of blood pressure and cognitive function, as well as the underlying structure of cognitive function.** Circles represent latent variables and squares represent measured variables. Latent variables for blood pressure were modelled as shown in Figure 1. Growth curves, including a latent level and linear slope factor, were estimated for each cognitive test, and the intercepts and slopes were analyzed in a hierarchical model which contained domain and overall factors of both level and slope. Basis coefficients (loadings on the individual test slopes) were fixed at 0, 2.96, 6.72, and 9.79 to precisely represent the amount of time passing between assessments. Dashed lines indicate the relationships between covariates which were fixed across waves and the overall and domain latent variables. To preserve interpretability, not all covariate relationships are shown. Solid, double arrowed lines indicate correlations between latent variables. Although only two domains and four tests are shown here, the full model used all fourteen tests and four domains, as described in the Methods.

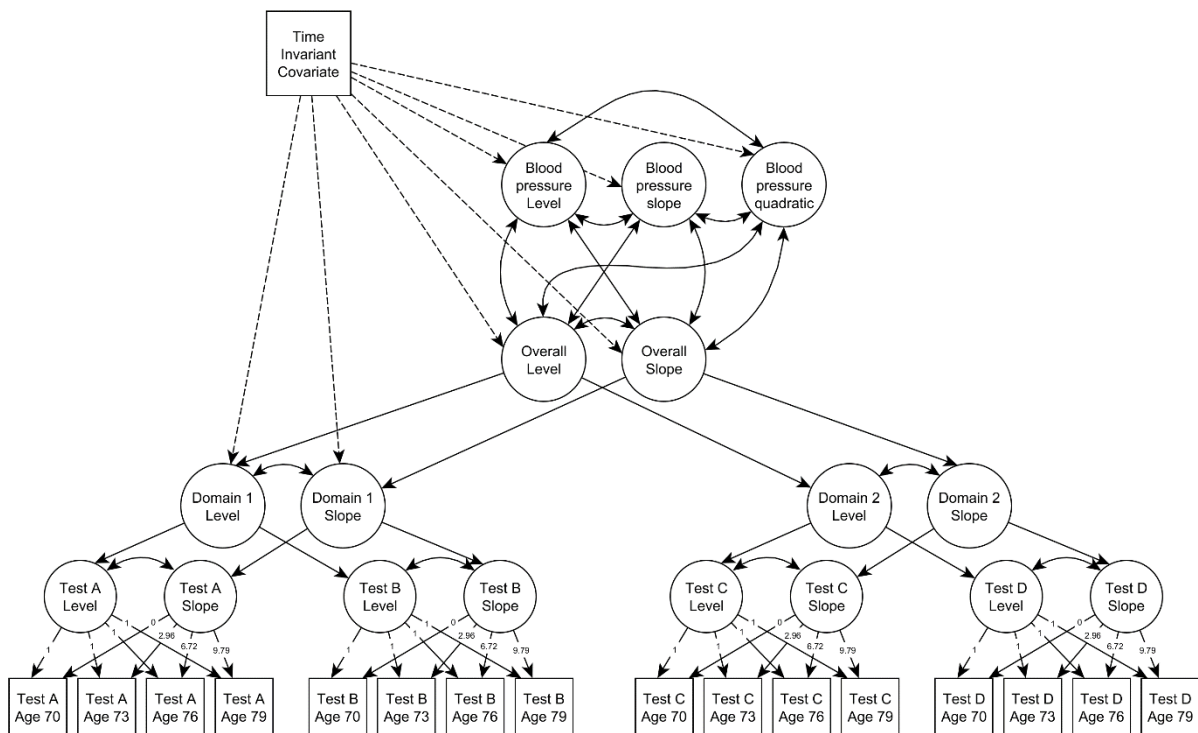

**Supplementary Table 1.** Descriptive statistics for cognitive, demographic, and clinical variables from study completers only (n = 539).

|                              | Wave 1        | Wave 2        | Wave 3        | Wave 4       |
|------------------------------|---------------|---------------|---------------|--------------|
| Female                       | 267 (49.5%)   | -             | -             | -            |
| Ever had high BP             | 193 (35.8%)   | 256 (47.5%)   | 286 (53.1%)   | 314 (58.3%)  |
| Ever had CVD                 | 123 (22.8%)   | 151 (28.0%)   | 185 (34.3%)   | 198 (36.7%)  |
| Ever had stroke              | 18 (3.33%)    | 31 (5.75%)    | 55 (10.2%)    | 69 (12.5%)   |
| Current smoker               | 24 (4.54%)    | 22 (4.08%)    | 19 (3.52%)    | 21 (3.90%)   |
| Ex-smoker                    | 226 (41.9%)   | 228 (42.3%)   | 222 (41.2%)   | 229 (42.4%)  |
| Average sitting systolic BP  | 147.7 (17.63) | 147.7 (18.18) | 147.7 (18.75) | 145.1 (18.7) |
| Average sitting diastolic BP | 81.0 (9.53)   | 77.9 (9.53)   | 79.0 (10.3)   | 76.8 (10.1)  |
| Years of education           | 10.9 (1.17)   | -             | -             | -            |
| Age 11 IQ                    | 102.2 (15.15) | -             | -             | -            |
| Matrix Reasoning*            | 14.7 (5.02)   | 13.2 (4.89)   | 13.3 (4.91)   | 13.0 (5.02)  |
| Block Design*                | 35.7 (10.1)   | 34.7 (10.1)   | 32.7 (9.79)   | 31.3 (9.66)  |
| Spatial Span*                | 7.27 (1.71)   | 7.15 (1.58)   | 7.15 (1.58)   | 6.75 (1.60)  |
| NART†                        | 35.6 (7.97)   | 35.2 (7.99)   | 35.6 (7.95)   | 35.7 (8.10)  |
| WTAR†                        | 41.9 (6.95)   | 41.8 (6.61)   | 41.6 (6.93)   | 41.7 (6.97)  |
| Verbal Fluency†              | 43.6 (12.8)   | 44.4 (13.0)   | 43.7 (12.7)   | 43.7 (13.3)  |
| Logical Memory‡              | 74.4 (16.9)   | 76.3 (16.9)   | 75.8 (18.4)   | 73.0 (20.3)  |
| VPA‡                         | 27.9 (8.53)   | 28.4 (9.04)   | 27.3 (9.25)   | 27.3 (9.44)  |
| Digit Span‡                  | 8.03 (2.37)   | 8.01 (2.32)   | 7.91 (2.41)   | 7.58 (2.19)  |
| LNS‡                         | 11.4 (3.11)   | 11.4 (3.08)   | 10.7 (2.98)   | 10.1 (2.87)  |
| Symbol Search§               | 25.6 (6.58)   | 25.5 (5.92)   | 25.3 (6.26)   | 22.8 (6.64)  |
| Digit-Symbol Coding§         | 59.0 (12.4)   | 58.4 (12.0)   | 55.4 (12.3)   | 51.4 (13.0)  |
| Inspection Time§             | 113 (10.5)    | 112 (11.7)    | 111 (11.8)    | 107 (13.6)   |
| Reaction Time§               | 0.63 (0.08)   | 0.64 (0.08)   | 0.67 (0.09)   | 0.70 (0.11)  |
| MMSE                         | 28.9 (1.28)   | 28.9 (1.21)   | 28.8 (1.53)   | 28.5 (2.16)  |

CVD, cardiovascular disease; BP, blood pressure; NART, National Adult Reading Test; WTAR, Wechsler Test of Adult Reading; VPA, Visual Paired Associates; LNS, Letter-Number Sequencing; MMSE, Mini-Mental State Examination; T2D, individuals with type 2 diabetes; T2D was defined as self-reported physician diagnosis of diabetes. \* part of the visuospatial ability domain, † part of the crystallized ability domain, ‡ part of the memory domain, § part of the processing speed domain.

**Supplementary Table 2.** Bivariate associations of the latent growth curve model (1A) of blood pressure and cognitive function.

| LHS                        | Path | RHS                        | Std. Estimate | S.E.  |
|----------------------------|------|----------------------------|---------------|-------|
| Blood pressure level       | ~~   | Blood pressure quadratic   | 0.293         | 0.065 |
| Blood pressure slope       | ~~   | Blood pressure quadratic   | -0.926        | 0.017 |
| Blood pressure level       | ~~   | Blood pressure slope       | -0.424        | 0.052 |
| Cognitive function level   | ~~   | Cognitive function slope   | 0.326         | 0.059 |
| Fluid function level       | ~~   | Fluid function slope       | -0.570        | 1.150 |
| Processing speed level     | ~~   | Processing speed slope     | -0.255        | 0.123 |
| Memory ability level       | ~~   | Memory ability slope       | -0.394        | 0.108 |
| Crystallized ability level | ~~   | Crystallized ability slope | -0.277        | 0.377 |
| Blood pressure level       | ~~   | Cognitive function level   | -0.024        | 0.036 |
| Blood pressure slope       | ~~   | Cognitive function slope   | -0.097        | 0.077 |
| Blood pressure quadratic   | ~~   | Cognitive function slope   | 0.171         | 0.076 |
| Blood pressure level       | ~~   | Cognitive function slope   | 0.046         | 0.043 |
| Blood pressure slope       | ~~   | Cognitive function level   | -0.003        | 0.055 |
| Blood pressure quadratic   | ~~   | Cognitive function level   | 0.015         | 0.069 |
| Cognitive function slope   | ~    | Sex                        | 0.110         | 0.043 |
| Cognitive function slope   | ~    | Age 11 cognitive function  | 0.016         | 0.044 |
| Cognitive function slope   | ~    | Education                  | -0.069        | 0.049 |
| Cognitive function slope   | ~    | Sex x age 11 CF            | -0.078        | 0.054 |
| Blood pressure quadratic   | ~    | Sex                        | 0.102         | 0.054 |
| Blood pressure quadratic   | ~    | Age 11 cognitive function  | 0.023         | 0.095 |
| Blood pressure quadratic   | ~    | Education                  | 0.060         | 0.060 |
| Blood pressure quadratic   | ~    | Sex x age 11 CF            | -0.122        | 0.085 |
| Blood pressure slope       | ~    | Sex                        | -0.020        | 0.048 |
| Blood pressure slope       | ~    | Age 11 cognitive function  | -0.031        | 0.079 |
| Blood pressure slope       | ~    | Education                  | -0.058        | 0.059 |
| Blood pressure slope       | ~    | Sex x age 11 CF            | 0.116         | 0.074 |

|                                          |   |                           |        |       |
|------------------------------------------|---|---------------------------|--------|-------|
| Blood pressure level                     | ~ | Sex                       | -0.059 | 0.032 |
| Blood pressure level                     | ~ | Age 11 cognitive function | 0.079  | 0.049 |
| Blood pressure level                     | ~ | Education                 | -0.024 | 0.038 |
| Blood pressure level                     | ~ | Sex x age 11 CF           | -0.136 | 0.050 |
| Cognitive function level                 | ~ | Sex x age 11 CF           | 0.022  | 0.029 |
| Cognitive function level                 | ~ | Sex                       | -0.050 | 0.026 |
| Cognitive function level                 | ~ | Age 11 cognitive function | 0.694  | 0.037 |
| Cognitive function level                 | ~ | Education                 | 0.222  | 0.019 |
| Systolic pressure measurement 1, wave 1  | ~ | Age at wave 1             | -0.010 | 0.025 |
| Systolic pressure measurement 2, wave 1  | ~ | Age at wave 1             | -0.040 | 0.024 |
| Systolic pressure measurement 3, wave 1  | ~ | Age at wave 1             | -0.057 | 0.028 |
| Diastolic pressure measurement 1, wave 1 | ~ | Age at wave 1             | -0.074 | 0.025 |
| Diastolic pressure measurement 2, wave 1 | ~ | Age at wave 1             | -0.061 | 0.027 |
| Diastolic pressure measurement 3, wave 1 | ~ | Age at wave 1             | -0.089 | 0.028 |
| Systolic pressure measurement 1, wave 2  | ~ | Age at wave 2             | -0.029 | 0.030 |
| Systolic pressure measurement 2, wave 2  | ~ | Age at wave 2             | 0.001  | 0.029 |
| Systolic pressure measurement 3, wave 2  | ~ | Age at wave 2             | 0.010  | 0.033 |
| Diastolic pressure measurement 1, wave 2 | ~ | Age at wave 2             | 0.019  | 0.039 |
| Diastolic pressure measurement 2, wave 2 | ~ | Age at wave 2             | 0.020  | 0.035 |
| Diastolic pressure measurement 3, wave 2 | ~ | Age at wave 2             | 0.014  | 0.033 |
| Systolic pressure measurement 1, wave 3  | ~ | Age at wave 3             | -0.069 | 0.036 |
| Systolic pressure measurement 2, wave 3  | ~ | Age at wave 3             | -0.092 | 0.032 |
| Systolic pressure measurement 3, wave 3  | ~ | Age at wave 3             | -0.081 | 0.034 |
| Diastolic pressure measurement 1, wave 3 | ~ | Age at wave 3             | 0.026  | 0.038 |
| Diastolic pressure measurement 2, wave 3 | ~ | Age at wave 3             | 0.028  | 0.036 |
| Diastolic pressure measurement 3, wave 3 | ~ | Age at wave 3             | 0.014  | 0.039 |
| Systolic pressure measurement 1, wave 4  | ~ | Age at wave 4             | -0.043 | 0.032 |
| Systolic pressure measurement 2, wave 4  | ~ | Age at wave 4             | -0.077 | 0.027 |
| Systolic pressure measurement 3, wave 4  | ~ | Age at wave 4             | -0.051 | 0.028 |
| Diastolic pressure measurement 1, wave 4 | ~ | Age at wave 4             | 0.049  | 0.042 |
| Diastolic pressure measurement 2, wave 4 | ~ | Age at wave 4             | 0.039  | 0.030 |

|                                          |    |                                          |       |       |
|------------------------------------------|----|------------------------------------------|-------|-------|
| Diastolic pressure measurement 3, wave 4 | ~  | Age at wave 4                            | 0.017 | 0.026 |
| Systolic pressure measurement 1, wave 1  | ~~ | Systolic pressure measurement 1, wave 1  | 0.131 | 0.010 |
| Systolic pressure measurement 2, wave 1  | ~~ | Systolic pressure measurement 2, wave 1  | 0.074 | 0.008 |
| Systolic pressure measurement 3, wave 1  | ~~ | Systolic pressure measurement 3, wave 1  | 0.097 | 0.008 |
| Diastolic pressure measurement 1, wave 1 | ~~ | Diastolic pressure measurement 1, wave 1 | 0.141 | 0.014 |
| Diastolic pressure measurement 2, wave 1 | ~~ | Diastolic pressure measurement 2, wave 1 | 0.093 | 0.014 |
| Diastolic pressure measurement 3, wave 1 | ~~ | Diastolic pressure measurement 3, wave 1 | 0.150 | 0.015 |
| Systolic pressure measurement 1, wave 2  | ~~ | Systolic pressure measurement 1, wave 2  | 0.247 | 0.018 |
| Systolic pressure measurement 2, wave 2  | ~~ | Systolic pressure measurement 2, wave 2  | 0.039 | 0.008 |
| Systolic pressure measurement 3, wave 2  | ~~ | Systolic pressure measurement 3, wave 2  | 0.069 | 0.007 |
| Diastolic pressure measurement 1, wave 2 | ~~ | Diastolic pressure measurement 1, wave 2 | 0.113 | 0.013 |
| Diastolic pressure measurement 2, wave 2 | ~~ | Diastolic pressure measurement 2, wave 2 | 0.082 | 0.011 |
| Diastolic pressure measurement 3, wave 2 | ~~ | Diastolic pressure measurement 3, wave 2 | 0.094 | 0.016 |
| Systolic pressure measurement 1, wave 3  | ~~ | Systolic pressure measurement 1, wave 3  | 0.155 | 0.015 |
| Systolic pressure measurement 2, wave 3  | ~~ | Systolic pressure measurement 2, wave 3  | 0.068 | 0.013 |
| Systolic pressure measurement 3, wave 3  | ~~ | Systolic pressure measurement 3, wave 3  | 0.085 | 0.013 |
| Diastolic pressure measurement 1, wave 3 | ~~ | Diastolic pressure measurement 1, wave 3 | 0.144 | 0.021 |
| Diastolic pressure measurement 2, wave 3 | ~~ | Diastolic pressure measurement 2, wave 3 | 0.137 | 0.029 |
| Diastolic pressure measurement 3, wave 3 | ~~ | Diastolic pressure measurement 3, wave 3 | 0.168 | 0.016 |
| Systolic pressure measurement 1, wave 4  | ~~ | Systolic pressure measurement 1, wave 4  | 0.113 | 0.014 |
| Systolic pressure measurement 2, wave 4  | ~~ | Systolic pressure measurement 2, wave 4  | 0.045 | 0.009 |
| Systolic pressure measurement 3, wave 4  | ~~ | Systolic pressure measurement 3, wave 4  | 0.093 | 0.012 |
| Diastolic pressure measurement 1, wave 4 | ~~ | Diastolic pressure measurement 1, wave 4 | 0.140 | 0.025 |
| Diastolic pressure measurement 2, wave 4 | ~~ | Diastolic pressure measurement 2, wave 4 | 0.093 | 0.015 |
| Diastolic pressure measurement 3, wave 4 | ~~ | Diastolic pressure measurement 3, wave 4 | 0.102 | 0.011 |
| Blood pressure level                     | ~~ | Blood pressure level                     | 0.985 | 0.008 |
| Blood pressure slope                     | ~~ | Blood pressure slope                     | 0.989 | 0.013 |
| Blood pressure quadratic                 | ~~ | Blood pressure quadratic                 | 0.979 | 0.019 |
| Fluid function level                     | ~~ | Fluid function level                     | 0.389 | 0.045 |
| Processing speed level                   | ~~ | Processing speed level                   | 0.449 | 0.044 |
| Memory ability level                     | ~~ | Memory ability level                     | 0.258 | 0.034 |

|                            |    |                            |        |       |
|----------------------------|----|----------------------------|--------|-------|
| Crystallized ability level | ~~ | Crystallized ability level | 0.343  | 0.023 |
| Cognitive function level   | ~~ | Cognitive function level   | 0.314  | 0.028 |
| Fluid function slope       | ~~ | Fluid function slope       | 0.053  | 0.241 |
| Processing speed slope     | ~~ | Processing speed slope     | 0.177  | 0.089 |
| Memory ability slope       | ~~ | Memory ability slope       | 0.369  | 0.065 |
| Crystallized ability slope | ~~ | Crystallized ability slope | 0.311  | 0.655 |
| Cognitive function slope   | ~~ | Cognitive function slope   | 0.977  | 0.012 |
| Sex                        | ~~ | Sex                        | 1.000  | 0.000 |
| Sex                        | ~~ | Age 11 cognitive function  | 0.065  | 0.000 |
| Sex                        | ~~ | Education                  | -0.008 | 0.000 |
| Sex                        | ~~ | Sex x age 11 CF            | 0.051  | 0.000 |
| Sex                        | ~~ | Age at wave 1              | 0.004  | 0.000 |
| Sex                        | ~~ | Age at wave 2              | 0.022  | 0.000 |
| Sex                        | ~~ | Age at wave 3              | -0.009 | 0.000 |
| Sex                        | ~~ | Age at wave 4              | 0.001  | 0.000 |
| Age 11 cognitive function  | ~~ | Age 11 cognitive function  | 1.000  | 0.000 |
| Age 11 cognitive function  | ~~ | Education                  | 0.432  | 0.000 |
| Age 11 cognitive function  | ~~ | Sex x age 11 CF            | 0.660  | 0.000 |
| Age 11 cognitive function  | ~~ | Age at wave 1              | -0.097 | 0.000 |
| Age 11 cognitive function  | ~~ | Age at wave 2              | -0.084 | 0.000 |
| Age 11 cognitive function  | ~~ | Age at wave 3              | -0.103 | 0.000 |
| Age 11 cognitive function  | ~~ | Age at wave 4              | -0.095 | 0.000 |
| Education                  | ~~ | Education                  | 1.000  | 0.000 |
| Education                  | ~~ | Sex x age 11 CF            | 0.296  | 0.000 |
| Education                  | ~~ | Age at wave 1              | -0.075 | 0.000 |
| Education                  | ~~ | Age at wave 2              | -0.047 | 0.000 |
| Education                  | ~~ | Age at wave 3              | -0.085 | 0.000 |
| Education                  | ~~ | Age at wave 4              | -0.066 | 0.000 |
| Sex x age 11 CF            | ~~ | Sex x age 11 CF            | 1.000  | 0.000 |
| Sex x age 11 CF            | ~~ | Age at wave 1              | -0.073 | 0.000 |
| Sex x age 11 CF            | ~~ | Age at wave 2              | -0.065 | 0.000 |



|                 |    |               |        |       |
|-----------------|----|---------------|--------|-------|
| Sex x age 11 CF | ~~ | Age at wave 3 | -0.098 | 0.000 |
| Sex x age 11 CF | ~~ | Age at wave 4 | -0.086 | 0.000 |
| Age at wave 1   | ~~ | Age at wave 1 | 1.000  | 0.000 |
| Age at wave 1   | ~~ | Age at wave 2 | 0.945  | 0.000 |
| Age at wave 1   | ~~ | Age at wave 3 | 0.936  | 0.000 |
| Age at wave 1   | ~~ | Age at wave 4 | 0.893  | 0.000 |
| Age at wave 2   | ~~ | Age at wave 2 | 1.000  | 0.000 |
| Age at wave 2   | ~~ | Age at wave 3 | 0.922  | 0.000 |
| Age at wave 2   | ~~ | Age at wave 4 | 0.880  | 0.000 |
| Age at wave 3   | ~~ | Age at wave 3 | 1.000  | 0.000 |
| Age at wave 3   | ~~ | Age at wave 4 | 0.912  | 0.000 |
| Age at wave 4   | ~~ | Age at wave 4 | 1.000  | 0.000 |

---

LHS = Left-hand side (of the structural equation); RHS = right-hand side. The path column indicates the type of relationship between the two variables, ~ indicates a regression, and ~~ indicates a correlation or covariance.

**Supplementary Table 3.** Bivariate associations of the latent growth curve model (1B) of blood pressure and cognitive function with control covariates.

| LHS                        | Path | RHS                        | Std. Estimate | S.E.  |
|----------------------------|------|----------------------------|---------------|-------|
| Blood pressure level       | ~~   | Blood pressure quadratic   | 0.264         | 0.095 |
| Blood pressure slope       | ~~   | Blood pressure quadratic   | -0.929        | 0.018 |
| Blood pressure level       | ~~   | Blood pressure slope       | -0.385        | 0.077 |
| Cognitive function level   | ~~   | Cognitive function slope   | 0.358         | 0.095 |
| Fluid function level       | ~~   | Fluid function slope       | -0.682        | 0.504 |
| Processing speed level     | ~~   | Processing speed slope     | -0.395        | 0.123 |
| Memory ability level       | ~~   | Memory ability slope       | -0.455        | 0.092 |
| Crystallized ability level | ~~   | Crystallized ability slope | -0.174        | 0.330 |
| Blood pressure level       | ~~   | Cognitive function level   | -0.046        | 0.059 |
| Blood pressure slope       | ~~   | Cognitive function slope   | -0.110        | 0.081 |
| Blood pressure quadratic   | ~~   | Cognitive function slope   | 0.168         | 0.092 |
| Blood pressure level       | ~~   | Cognitive function slope   | 0.063         | 0.057 |
| Blood pressure slope       | ~~   | Cognitive function level   | 0.038         | 0.090 |
| Blood pressure quadratic   | ~~   | Cognitive function level   | -0.005        | 0.092 |
| Cognitive function slope   | ~    | Age 11 cognitive function  | -0.011        | 0.088 |
| Cognitive function slope   | ~    | Education                  | -0.081        | 0.064 |
| Cognitive function slope   | ~    | APOEe4                     | -0.183        | 0.064 |
| Cognitive function slope   | ~    | Sex                        | 0.111         | 0.055 |
| Cognitive function slope   | ~    | Sex x age 11 CF            | 0.027         | 0.066 |
| Blood pressure quadratic   | ~    | Age 11 cognitive function  | -0.043        | 0.112 |
| Blood pressure quadratic   | ~    | Education                  | 0.156         | 0.088 |
| Blood pressure quadratic   | ~    | Current smoker             | -0.194        | 0.100 |
| Blood pressure quadratic   | ~    | Former Current smoker      | -0.012        | 0.075 |

|                                          |   |                           |        |       |
|------------------------------------------|---|---------------------------|--------|-------|
| Blood pressure quadratic                 | ~ | Sex                       | 0.171  | 0.061 |
| Blood pressure quadratic                 | ~ | Sex x age 11 CF           | -0.035 | 0.110 |
| Blood pressure slope                     | ~ | Age 11 cognitive function | 0.002  | 0.099 |
| Blood pressure slope                     | ~ | Education                 | -0.140 | 0.075 |
| Blood pressure slope                     | ~ | Current smoker            | 0.178  | 0.089 |
| Blood pressure slope                     | ~ | Former Current smoker     | 0.014  | 0.072 |
| Blood pressure slope                     | ~ | Sex                       | -0.073 | 0.049 |
| Blood pressure slope                     | ~ | Sex x age 11 CF           | 0.054  | 0.102 |
| Blood pressure level                     | ~ | Age 11 cognitive function | 0.099  | 0.072 |
| Blood pressure level                     | ~ | Education                 | -0.029 | 0.053 |
| Blood pressure level                     | ~ | Current smoker            | -0.104 | 0.040 |
| Blood pressure level                     | ~ | Former Current smoker     | 0.011  | 0.047 |
| Blood pressure level                     | ~ | Sex                       | -0.055 | 0.046 |
| Blood pressure level                     | ~ | Sex x age 11 CF           | -0.106 | 0.058 |
| Cognitive function level                 | ~ | Age 11 cognitive function | 0.741  | 0.035 |
| Cognitive function level                 | ~ | Education                 | 0.242  | 0.031 |
| Cognitive function level                 | ~ | APOEe4                    | -0.083 | 0.027 |
| Cognitive function level                 | ~ | Sex                       | -0.051 | 0.025 |
| Cognitive function level                 | ~ | Sex x age 11 CF           | 0.011  | 0.051 |
| Systolic pressure measurement 1, wave 1  | ~ | Age at wave 1             | -0.050 | 0.047 |
| Systolic pressure measurement 1, wave 1  | ~ | CVD history at wave 1     | 0.011  | 0.038 |
| Systolic pressure measurement 1, wave 1  | ~ | Stroke history at wave 1  | 0.037  | 0.047 |
| Systolic pressure measurement 2, wave 1  | ~ | Age at wave 1             | -0.097 | 0.040 |
| Systolic pressure measurement 2, wave 1  | ~ | CVD history at wave 1     | 0.005  | 0.039 |
| Systolic pressure measurement 2, wave 1  | ~ | Stroke history at wave 1  | 0.063  | 0.049 |
| Systolic pressure measurement 3, wave 1  | ~ | Age at wave 1             | -0.096 | 0.048 |
| Systolic pressure measurement 3, wave 1  | ~ | CVD history at wave 1     | 0.012  | 0.037 |
| Systolic pressure measurement 3, wave 1  | ~ | Stroke history at wave 1  | 0.061  | 0.048 |
| Diastolic pressure measurement 1, wave 1 | ~ | Age at wave 1             | -0.103 | 0.038 |
| Diastolic pressure measurement 1, wave 1 | ~ | CVD history at wave 1     | -0.050 | 0.045 |

|                                          |   |                          |        |       |
|------------------------------------------|---|--------------------------|--------|-------|
| Diastolic pressure measurement 1, wave 1 | ~ | Stroke history at wave 1 | 0.028  | 0.029 |
| Diastolic pressure measurement 2, wave 1 | ~ | Age at wave 1            | -0.079 | 0.044 |
| Diastolic pressure measurement 2, wave 1 | ~ | CVD history at wave 1    | -0.012 | 0.045 |
| Diastolic pressure measurement 2, wave 1 | ~ | Stroke history at wave 1 | 0.030  | 0.028 |
| Diastolic pressure measurement 3, wave 1 | ~ | Age at wave 1            | -0.102 | 0.037 |
| Diastolic pressure measurement 3, wave 1 | ~ | CVD history at wave 1    | -0.041 | 0.044 |
| Diastolic pressure measurement 3, wave 1 | ~ | Stroke history at wave 1 | 0.035  | 0.027 |
| Systolic pressure measurement 1, wave 2  | ~ | Age at wave 2            | -0.024 | 0.043 |
| Systolic pressure measurement 1, wave 2  | ~ | CVD history at wave 2    | -0.122 | 0.037 |
| Systolic pressure measurement 1, wave 2  | ~ | Stroke history at wave 2 | 0.025  | 0.042 |
| Systolic pressure measurement 2, wave 2  | ~ | Age at wave 2            | 0.011  | 0.049 |
| Systolic pressure measurement 2, wave 2  | ~ | CVD history at wave 2    | -0.045 | 0.035 |
| Systolic pressure measurement 2, wave 2  | ~ | Stroke history at wave 2 | -0.014 | 0.045 |
| Systolic pressure measurement 3, wave 2  | ~ | Age at wave 2            | 0.026  | 0.046 |
| Systolic pressure measurement 3, wave 2  | ~ | CVD history at wave 2    | -0.026 | 0.031 |
| Systolic pressure measurement 3, wave 2  | ~ | Stroke history at wave 2 | -0.011 | 0.042 |
| Diastolic pressure measurement 1, wave 2 | ~ | Age at wave 2            | 0.048  | 0.043 |
| Diastolic pressure measurement 1, wave 2 | ~ | CVD history at wave 2    | -0.053 | 0.053 |
| Diastolic pressure measurement 1, wave 2 | ~ | Stroke history at wave 2 | -0.017 | 0.037 |
| Diastolic pressure measurement 2, wave 2 | ~ | Age at wave 2            | 0.053  | 0.041 |
| Diastolic pressure measurement 2, wave 2 | ~ | CVD history at wave 2    | -0.051 | 0.051 |
| Diastolic pressure measurement 2, wave 2 | ~ | Stroke history at wave 2 | -0.019 | 0.035 |
| Diastolic pressure measurement 3, wave 2 | ~ | Age at wave 2            | 0.042  | 0.042 |
| Diastolic pressure measurement 3, wave 2 | ~ | CVD history at wave 2    | -0.037 | 0.053 |
| Diastolic pressure measurement 3, wave 2 | ~ | Stroke history at wave 2 | -0.014 | 0.038 |
| Systolic pressure measurement 1, wave 3  | ~ | Age at wave 3            | -0.101 | 0.048 |
| Systolic pressure measurement 1, wave 3  | ~ | CVD history at wave 3    | -0.108 | 0.037 |
| Systolic pressure measurement 1, wave 3  | ~ | Stroke history at wave 3 | -0.078 | 0.040 |
| Systolic pressure measurement 2, wave 3  | ~ | Age at wave 3            | -0.092 | 0.048 |
| Systolic pressure measurement 2, wave 3  | ~ | CVD history at wave 3    | -0.116 | 0.035 |

|                                          |   |                          |        |       |
|------------------------------------------|---|--------------------------|--------|-------|
| Systolic pressure measurement 2, wave 3  | ~ | Stroke history at wave 3 | -0.045 | 0.041 |
| Systolic pressure measurement 3, wave 3  | ~ | Age at wave 3            | -0.103 | 0.049 |
| Systolic pressure measurement 3, wave 3  | ~ | CVD history at wave 3    | -0.083 | 0.038 |
| Systolic pressure measurement 3, wave 3  | ~ | Stroke history at wave 3 | -0.028 | 0.041 |
| Diastolic pressure measurement 1, wave 3 | ~ | Age at wave 3            | 0.043  | 0.041 |
| Diastolic pressure measurement 1, wave 3 | ~ | CVD history at wave 3    | -0.055 | 0.056 |
| Diastolic pressure measurement 1, wave 3 | ~ | Stroke history at wave 3 | -0.047 | 0.046 |
| Diastolic pressure measurement 2, wave 3 | ~ | Age at wave 3            | 0.060  | 0.043 |
| Diastolic pressure measurement 2, wave 3 | ~ | CVD history at wave 3    | -0.033 | 0.042 |
| Diastolic pressure measurement 2, wave 3 | ~ | Stroke history at wave 3 | -0.044 | 0.045 |
| Diastolic pressure measurement 3, wave 3 | ~ | Age at wave 3            | 0.026  | 0.044 |
| Diastolic pressure measurement 3, wave 3 | ~ | CVD history at wave 3    | -0.049 | 0.053 |
| Diastolic pressure measurement 3, wave 3 | ~ | Stroke history at wave 3 | -0.046 | 0.045 |
| Systolic pressure measurement 1, wave 4  | ~ | Age at wave 4            | -0.062 | 0.031 |
| Systolic pressure measurement 1, wave 4  | ~ | CVD history at wave 4    | 0.013  | 0.034 |
| Systolic pressure measurement 1, wave 4  | ~ | Stroke history at wave 4 | -0.082 | 0.037 |
| Systolic pressure measurement 2, wave 4  | ~ | Age at wave 4            | -0.092 | 0.031 |
| Systolic pressure measurement 2, wave 4  | ~ | CVD history at wave 4    | -0.008 | 0.034 |
| Systolic pressure measurement 2, wave 4  | ~ | Stroke history at wave 4 | -0.029 | 0.040 |
| Systolic pressure measurement 3, wave 4  | ~ | Age at wave 4            | -0.068 | 0.036 |
| Systolic pressure measurement 3, wave 4  | ~ | CVD history at wave 4    | 0.004  | 0.037 |
| Systolic pressure measurement 3, wave 4  | ~ | Stroke history at wave 4 | -0.058 | 0.044 |
| Diastolic pressure measurement 1, wave 4 | ~ | Age at wave 4            | 0.056  | 0.046 |
| Diastolic pressure measurement 1, wave 4 | ~ | CVD history at wave 4    | -0.061 | 0.038 |
| Diastolic pressure measurement 1, wave 4 | ~ | Stroke history at wave 4 | -0.058 | 0.045 |
| Diastolic pressure measurement 2, wave 4 | ~ | Age at wave 4            | 0.039  | 0.043 |
| Diastolic pressure measurement 2, wave 4 | ~ | CVD history at wave 4    | -0.049 | 0.042 |
| Diastolic pressure measurement 2, wave 4 | ~ | Stroke history at wave 4 | -0.030 | 0.046 |
| Diastolic pressure measurement 3, wave 4 | ~ | Age at wave 4            | 0.024  | 0.045 |
| Diastolic pressure measurement 3, wave 4 | ~ | CVD history at wave 4    | -0.042 | 0.044 |

|                                          |    |                                          |        |       |
|------------------------------------------|----|------------------------------------------|--------|-------|
| Diastolic pressure measurement 3, wave 4 | ~  | Stroke history at wave 4                 | -0.022 | 0.049 |
| Systolic pressure measurement 1, wave 1  | ~~ | Systolic pressure measurement 1, wave 1  | 0.129  | 0.015 |
| Systolic pressure measurement 2, wave 1  | ~~ | Systolic pressure measurement 2, wave 1  | 0.093  | 0.010 |
| Systolic pressure measurement 3, wave 1  | ~~ | Systolic pressure measurement 3, wave 1  | 0.097  | 0.013 |
| Diastolic pressure measurement 1, wave 1 | ~~ | Diastolic pressure measurement 1, wave 1 | 0.135  | 0.018 |
| Diastolic pressure measurement 2, wave 1 | ~~ | Diastolic pressure measurement 2, wave 1 | 0.099  | 0.013 |
| Diastolic pressure measurement 3, wave 1 | ~~ | Diastolic pressure measurement 3, wave 1 | 0.165  | 0.019 |
| Systolic pressure measurement 1, wave 2  | ~~ | Systolic pressure measurement 1, wave 2  | 0.197  | 0.016 |
| Systolic pressure measurement 2, wave 2  | ~~ | Systolic pressure measurement 2, wave 2  | 0.039  | 0.008 |
| Systolic pressure measurement 3, wave 2  | ~~ | Systolic pressure measurement 3, wave 2  | 0.082  | 0.009 |
| Diastolic pressure measurement 1, wave 2 | ~~ | Diastolic pressure measurement 1, wave 2 | 0.100  | 0.015 |
| Diastolic pressure measurement 2, wave 2 | ~~ | Diastolic pressure measurement 2, wave 2 | 0.075  | 0.011 |
| Diastolic pressure measurement 3, wave 2 | ~~ | Diastolic pressure measurement 3, wave 2 | 0.110  | 0.021 |
| Systolic pressure measurement 1, wave 3  | ~~ | Systolic pressure measurement 1, wave 3  | 0.141  | 0.018 |
| Systolic pressure measurement 2, wave 3  | ~~ | Systolic pressure measurement 2, wave 3  | 0.083  | 0.010 |
| Systolic pressure measurement 3, wave 3  | ~~ | Systolic pressure measurement 3, wave 3  | 0.085  | 0.012 |
| Diastolic pressure measurement 1, wave 3 | ~~ | Diastolic pressure measurement 1, wave 3 | 0.135  | 0.022 |
| Diastolic pressure measurement 2, wave 3 | ~~ | Diastolic pressure measurement 2, wave 3 | 0.146  | 0.034 |
| Diastolic pressure measurement 3, wave 3 | ~~ | Diastolic pressure measurement 3, wave 3 | 0.172  | 0.025 |
| Systolic pressure measurement 1, wave 4  | ~~ | Systolic pressure measurement 1, wave 4  | 0.118  | 0.013 |
| Systolic pressure measurement 2, wave 4  | ~~ | Systolic pressure measurement 2, wave 4  | 0.042  | 0.007 |
| Systolic pressure measurement 3, wave 4  | ~~ | Systolic pressure measurement 3, wave 4  | 0.104  | 0.013 |
| Diastolic pressure measurement 1, wave 4 | ~~ | Diastolic pressure measurement 1, wave 4 | 0.148  | 0.023 |
| Diastolic pressure measurement 2, wave 4 | ~~ | Diastolic pressure measurement 2, wave 4 | 0.102  | 0.018 |
| Diastolic pressure measurement 3, wave 4 | ~~ | Diastolic pressure measurement 3, wave 4 | 0.098  | 0.015 |
| Blood pressure level                     | ~~ | Blood pressure level                     | 0.976  | 0.015 |
| Blood pressure slope                     | ~~ | Blood pressure slope                     | 0.950  | 0.035 |
| Blood pressure quadratic                 | ~~ | Blood pressure quadratic                 | 0.922  | 0.045 |
| Fluid function level                     | ~~ | Fluid function level                     | 0.489  | 0.052 |
| Processing speed level                   | ~~ | Processing speed level                   | 0.545  | 0.051 |

|                            |    |                            |        |       |
|----------------------------|----|----------------------------|--------|-------|
| Memory ability level       | ~~ | Memory ability level       | 0.350  | 0.045 |
| Crystallized ability level | ~~ | Crystallized ability level | 0.325  | 0.037 |
| Cognitive function level   | ~~ | Cognitive function level   | 0.212  | 0.031 |
| Fluid function slope       | ~~ | Fluid function slope       | 0.158  | 0.249 |
| Processing speed slope     | ~~ | Processing speed slope     | 0.239  | 0.100 |
| Memory ability slope       | ~~ | Memory ability slope       | 0.409  | 0.104 |
| Crystallized ability slope | ~~ | Crystallized ability slope | 0.361  | 0.916 |
| Cognitive function slope   | ~~ | Cognitive function slope   | 0.944  | 0.026 |
| Age 11 cognitive function  | ~~ | Age 11 cognitive function  | 1.000  | 0.000 |
| Age 11 cognitive function  | ~~ | Education                  | 0.445  | 0.000 |
| Age 11 cognitive function  | ~~ | APOEe4                     | -0.043 | 0.000 |
| Age 11 cognitive function  | ~~ | Sex                        | 0.091  | 0.000 |
| Age 11 cognitive function  | ~~ | Sex x age 11 CF            | 0.659  | 0.000 |
| Age 11 cognitive function  | ~~ | Current smoker             | 0.012  | 0.000 |
| Age 11 cognitive function  | ~~ | Former Current smoker      | -0.092 | 0.000 |
| Age 11 cognitive function  | ~~ | Age at wave 1              | -0.090 | 0.000 |
| Age 11 cognitive function  | ~~ | CVD history at wave 1      | -0.128 | 0.000 |
| Age 11 cognitive function  | ~~ | Stroke history at wave 1   | 0.001  | 0.000 |
| Age 11 cognitive function  | ~~ | Age at wave 2              | -0.076 | 0.000 |
| Age 11 cognitive function  | ~~ | CVD history at wave 2      | -0.097 | 0.000 |
| Age 11 cognitive function  | ~~ | Stroke history at wave 2   | 0.039  | 0.000 |
| Age 11 cognitive function  | ~~ | Age at wave 3              | -0.081 | 0.000 |
| Age 11 cognitive function  | ~~ | CVD history at wave 3      | -0.055 | 0.000 |
| Age 11 cognitive function  | ~~ | Stroke history at wave 3   | 0.019  | 0.000 |
| Age 11 cognitive function  | ~~ | Age at wave 4              | -0.073 | 0.000 |
| Age 11 cognitive function  | ~~ | CVD history at wave 4      | -0.043 | 0.000 |
| Age 11 cognitive function  | ~~ | Stroke history at wave 4   | -0.027 | 0.000 |
| Education                  | ~~ | Education                  | 1.000  | 0.000 |
| Education                  | ~~ | APOEe4                     | -0.028 | 0.000 |
| Education                  | ~~ | Sex                        | 0.025  | 0.000 |

|           |    |                          |        |       |
|-----------|----|--------------------------|--------|-------|
| Education | ~~ | Sex x age 11 CF          | 0.263  | 0.000 |
| Education | ~~ | Current smoker           | 0.046  | 0.000 |
| Education | ~~ | Former Current smoker    | -0.091 | 0.000 |
| Education | ~~ | Age at wave 1            | -0.088 | 0.000 |
| Education | ~~ | CVD history at wave 1    | -0.056 | 0.000 |
| Education | ~~ | Stroke history at wave 1 | -0.035 | 0.000 |
| Education | ~~ | Age at wave 2            | -0.054 | 0.000 |
| Education | ~~ | CVD history at wave 2    | -0.043 | 0.000 |
| Education | ~~ | Stroke history at wave 2 | -0.006 | 0.000 |
| Education | ~~ | Age at wave 3            | -0.098 | 0.000 |
| Education | ~~ | CVD history at wave 3    | -0.042 | 0.000 |
| Education | ~~ | Stroke history at wave 3 | 0.032  | 0.000 |
| Education | ~~ | Age at wave 4            | -0.075 | 0.000 |
| Education | ~~ | CVD history at wave 4    | -0.064 | 0.000 |
| Education | ~~ | Stroke history at wave 4 | 0.033  | 0.000 |
| APOEe4    | ~~ | APOEe4                   | 1.000  | 0.000 |
| APOEe4    | ~~ | Sex                      | -0.104 | 0.000 |
| APOEe4    | ~~ | Sex x age 11 CF          | -0.013 | 0.000 |
| APOEe4    | ~~ | Current smoker           | -0.111 | 0.000 |
| APOEe4    | ~~ | Former Current smoker    | 0.009  | 0.000 |
| APOEe4    | ~~ | Age at wave 1            | 0.048  | 0.000 |
| APOEe4    | ~~ | CVD history at wave 1    | 0.013  | 0.000 |
| APOEe4    | ~~ | Stroke history at wave 1 | -0.047 | 0.000 |
| APOEe4    | ~~ | Age at wave 2            | 0.030  | 0.000 |
| APOEe4    | ~~ | CVD history at wave 2    | 0.017  | 0.000 |
| APOEe4    | ~~ | Stroke history at wave 2 | -0.044 | 0.000 |
| APOEe4    | ~~ | Age at wave 3            | 0.055  | 0.000 |
| APOEe4    | ~~ | CVD history at wave 3    | 0.015  | 0.000 |
| APOEe4    | ~~ | Stroke history at wave 3 | 0.000  | 0.000 |
| APOEe4    | ~~ | Age at wave 4            | 0.033  | 0.000 |



|                 |    |                          |        |       |
|-----------------|----|--------------------------|--------|-------|
| APOEe4          | ~~ | CVD history at wave 4    | -0.001 | 0.000 |
| APOEe4          | ~~ | Stroke history at wave 4 | 0.000  | 0.000 |
| Sex             | ~~ | Sex                      | 1.000  | 0.000 |
| Sex             | ~~ | Sex x age 11 CF          | 0.179  | 0.000 |
| Sex             | ~~ | Current smoker           | 0.078  | 0.000 |
| Sex             | ~~ | Former Current smoker    | -0.123 | 0.000 |
| Sex             | ~~ | Age at wave 1            | 0.020  | 0.000 |
| Sex             | ~~ | CVD history at wave 1    | -0.122 | 0.000 |
| Sex             | ~~ | Stroke history at wave 1 | -0.021 | 0.000 |
| Sex             | ~~ | Age at wave 2            | 0.043  | 0.000 |
| Sex             | ~~ | CVD history at wave 2    | -0.149 | 0.000 |
| Sex             | ~~ | Stroke history at wave 2 | -0.024 | 0.000 |
| Sex             | ~~ | Age at wave 3            | 0.003  | 0.000 |
| Sex             | ~~ | CVD history at wave 3    | -0.113 | 0.000 |
| Sex             | ~~ | Stroke history at wave 3 | -0.038 | 0.000 |
| Sex             | ~~ | Age at wave 4            | 0.018  | 0.000 |
| Sex             | ~~ | CVD history at wave 4    | -0.084 | 0.000 |
| Sex             | ~~ | Stroke history at wave 4 | -0.047 | 0.000 |
| Sex x age 11 CF | ~~ | Sex x age 11 CF          | 1.000  | 0.000 |
| Sex x age 11 CF | ~~ | Current smoker           | 0.021  | 0.000 |
| Sex x age 11 CF | ~~ | Former Current smoker    | -0.066 | 0.000 |
| Sex x age 11 CF | ~~ | Age at wave 1            | -0.046 | 0.000 |
| Sex x age 11 CF | ~~ | CVD history at wave 1    | -0.104 | 0.000 |
| Sex x age 11 CF | ~~ | Stroke history at wave 1 | -0.018 | 0.000 |
| Sex x age 11 CF | ~~ | Age at wave 2            | -0.032 | 0.000 |
| Sex x age 11 CF | ~~ | CVD history at wave 2    | -0.082 | 0.000 |
| Sex x age 11 CF | ~~ | Stroke history at wave 2 | 0.027  | 0.000 |
| Sex x age 11 CF | ~~ | Age at wave 3            | -0.068 | 0.000 |
| Sex x age 11 CF | ~~ | CVD history at wave 3    | -0.054 | 0.000 |
| Sex x age 11 CF | ~~ | Stroke history at wave 3 | 0.016  | 0.000 |

|                       |    |                          |        |       |
|-----------------------|----|--------------------------|--------|-------|
| Sex x age 11 CF       | ~~ | Age at wave 4            | -0.047 | 0.000 |
| Sex x age 11 CF       | ~~ | CVD history at wave 4    | -0.073 | 0.000 |
| Sex x age 11 CF       | ~~ | Stroke history at wave 4 | -0.041 | 0.000 |
| Current smoker        | ~~ | Current smoker           | 1.000  | 0.000 |
| Current smoker        | ~~ | Former Current smoker    | -0.176 | 0.000 |
| Current smoker        | ~~ | Age at wave 1            | 0.056  | 0.000 |
| Current smoker        | ~~ | CVD history at wave 1    | 0.069  | 0.000 |
| Current smoker        | ~~ | Stroke history at wave 1 | 0.081  | 0.000 |
| Current smoker        | ~~ | Age at wave 2            | 0.049  | 0.000 |
| Current smoker        | ~~ | CVD history at wave 2    | 0.085  | 0.000 |
| Current smoker        | ~~ | Stroke history at wave 2 | 0.043  | 0.000 |
| Current smoker        | ~~ | Age at wave 3            | 0.026  | 0.000 |
| Current smoker        | ~~ | CVD history at wave 3    | 0.054  | 0.000 |
| Current smoker        | ~~ | Stroke history at wave 3 | 0.006  | 0.000 |
| Current smoker        | ~~ | Age at wave 4            | 0.058  | 0.000 |
| Current smoker        | ~~ | CVD history at wave 4    | 0.020  | 0.000 |
| Current smoker        | ~~ | Stroke history at wave 4 | 0.026  | 0.000 |
| Former Current smoker | ~~ | Former Current smoker    | 1.000  | 0.000 |
| Former Current smoker | ~~ | Age at wave 1            | 0.006  | 0.000 |
| Former Current smoker | ~~ | CVD history at wave 1    | 0.109  | 0.000 |
| Former Current smoker | ~~ | Stroke history at wave 1 | 0.004  | 0.000 |
| Former Current smoker | ~~ | Age at wave 2            | -0.025 | 0.000 |
| Former Current smoker | ~~ | CVD history at wave 2    | 0.102  | 0.000 |
| Former Current smoker | ~~ | Stroke history at wave 2 | 0.027  | 0.000 |
| Former Current smoker | ~~ | Age at wave 3            | -0.002 | 0.000 |
| Former Current smoker | ~~ | CVD history at wave 3    | 0.080  | 0.000 |
| Former Current smoker | ~~ | Stroke history at wave 3 | 0.076  | 0.000 |
| Former Current smoker | ~~ | Age at wave 4            | -0.011 | 0.000 |
| Former Current smoker | ~~ | CVD history at wave 4    | 0.130  | 0.000 |
| Former Current smoker | ~~ | Stroke history at wave 4 | 0.053  | 0.000 |

|                          |    |                          |        |       |
|--------------------------|----|--------------------------|--------|-------|
| Age at wave 1            | ~~ | Age at wave 1            | 1.000  | 0.000 |
| Age at wave 1            | ~~ | CVD history at wave 1    | 0.111  | 0.000 |
| Age at wave 1            | ~~ | Stroke history at wave 1 | 0.148  | 0.000 |
| Age at wave 1            | ~~ | Age at wave 2            | 0.949  | 0.000 |
| Age at wave 1            | ~~ | CVD history at wave 2    | 0.080  | 0.000 |
| Age at wave 1            | ~~ | Stroke history at wave 2 | 0.110  | 0.000 |
| Age at wave 1            | ~~ | Age at wave 3            | 0.944  | 0.000 |
| Age at wave 1            | ~~ | CVD history at wave 3    | 0.035  | 0.000 |
| Age at wave 1            | ~~ | Stroke history at wave 3 | 0.067  | 0.000 |
| Age at wave 1            | ~~ | Age at wave 4            | 0.893  | 0.000 |
| Age at wave 1            | ~~ | CVD history at wave 4    | 0.098  | 0.000 |
| Age at wave 1            | ~~ | Stroke history at wave 4 | 0.024  | 0.000 |
| CVD history at wave 1    | ~~ | CVD history at wave 1    | 1.000  | 0.000 |
| CVD history at wave 1    | ~~ | Stroke history at wave 1 | 0.010  | 0.000 |
| CVD history at wave 1    | ~~ | Age at wave 2            | 0.102  | 0.000 |
| CVD history at wave 1    | ~~ | CVD history at wave 2    | 0.779  | 0.000 |
| CVD history at wave 1    | ~~ | Stroke history at wave 2 | -0.002 | 0.000 |
| CVD history at wave 1    | ~~ | Age at wave 3            | 0.105  | 0.000 |
| CVD history at wave 1    | ~~ | CVD history at wave 3    | 0.635  | 0.000 |
| CVD history at wave 1    | ~~ | Stroke history at wave 3 | 0.027  | 0.000 |
| CVD history at wave 1    | ~~ | Age at wave 4            | 0.085  | 0.000 |
| CVD history at wave 1    | ~~ | CVD history at wave 4    | 0.567  | 0.000 |
| CVD history at wave 1    | ~~ | Stroke history at wave 4 | 0.036  | 0.000 |
| Stroke history at wave 1 | ~~ | Stroke history at wave 1 | 1.000  | 0.000 |
| Stroke history at wave 1 | ~~ | Age at wave 2            | 0.148  | 0.000 |
| Stroke history at wave 1 | ~~ | CVD history at wave 2    | -0.014 | 0.000 |
| Stroke history at wave 1 | ~~ | Stroke history at wave 2 | 0.761  | 0.000 |
| Stroke history at wave 1 | ~~ | Age at wave 3            | 0.132  | 0.000 |
| Stroke history at wave 1 | ~~ | CVD history at wave 3    | -0.014 | 0.000 |
| Stroke history at wave 1 | ~~ | Stroke history at wave 3 | 0.570  | 0.000 |

|                          |    |                          |        |       |
|--------------------------|----|--------------------------|--------|-------|
| Stroke history at wave 1 | ~~ | Age at wave 4            | 0.132  | 0.000 |
| Stroke history at wave 1 | ~~ | CVD history at wave 4    | -0.047 | 0.000 |
| Stroke history at wave 1 | ~~ | Stroke history at wave 4 | 0.511  | 0.000 |
| Age at wave 2            | ~~ | Age at wave 2            | 1.000  | 0.000 |
| Age at wave 2            | ~~ | CVD history at wave 2    | 0.056  | 0.000 |
| Age at wave 2            | ~~ | Stroke history at wave 2 | 0.111  | 0.000 |
| Age at wave 2            | ~~ | Age at wave 3            | 0.923  | 0.000 |
| Age at wave 2            | ~~ | CVD history at wave 3    | 0.020  | 0.000 |
| Age at wave 2            | ~~ | Stroke history at wave 3 | 0.060  | 0.000 |
| Age at wave 2            | ~~ | Age at wave 4            | 0.877  | 0.000 |
| Age at wave 2            | ~~ | CVD history at wave 4    | 0.067  | 0.000 |
| Age at wave 2            | ~~ | Stroke history at wave 4 | 0.013  | 0.000 |
| CVD history at wave 2    | ~~ | CVD history at wave 2    | 1.000  | 0.000 |
| CVD history at wave 2    | ~~ | Stroke history at wave 2 | -0.014 | 0.000 |
| CVD history at wave 2    | ~~ | Age at wave 3            | 0.082  | 0.000 |
| CVD history at wave 2    | ~~ | CVD history at wave 3    | 0.738  | 0.000 |
| CVD history at wave 2    | ~~ | Stroke history at wave 3 | 0.014  | 0.000 |
| CVD history at wave 2    | ~~ | Age at wave 4            | 0.053  | 0.000 |
| CVD history at wave 2    | ~~ | CVD history at wave 4    | 0.684  | 0.000 |
| CVD history at wave 2    | ~~ | Stroke history at wave 4 | 0.000  | 0.000 |
| Stroke history at wave 2 | ~~ | Stroke history at wave 2 | 1.000  | 0.000 |
| Stroke history at wave 2 | ~~ | Age at wave 3            | 0.107  | 0.000 |
| Stroke history at wave 2 | ~~ | CVD history at wave 3    | -0.027 | 0.000 |
| Stroke history at wave 2 | ~~ | Stroke history at wave 3 | 0.719  | 0.000 |
| Stroke history at wave 2 | ~~ | Age at wave 4            | 0.104  | 0.000 |
| Stroke history at wave 2 | ~~ | CVD history at wave 4    | -0.039 | 0.000 |
| Stroke history at wave 2 | ~~ | Stroke history at wave 4 | 0.643  | 0.000 |
| Age at wave 3            | ~~ | Age at wave 3            | 1.000  | 0.000 |
| Age at wave 3            | ~~ | CVD history at wave 3    | 0.049  | 0.000 |
| Age at wave 3            | ~~ | Stroke history at wave 3 | 0.076  | 0.000 |

|                          |    |                          |        |       |
|--------------------------|----|--------------------------|--------|-------|
| Age at wave 3            | ~~ | Age at wave 4            | 0.902  | 0.000 |
| Age at wave 3            | ~~ | CVD history at wave 4    | 0.102  | 0.000 |
| Age at wave 3            | ~~ | Stroke history at wave 4 | 0.034  | 0.000 |
| CVD history at wave 3    | ~~ | CVD history at wave 3    | 1.000  | 0.000 |
| CVD history at wave 3    | ~~ | Stroke history at wave 3 | 0.015  | 0.000 |
| CVD history at wave 3    | ~~ | Age at wave 4            | 0.032  | 0.000 |
| CVD history at wave 3    | ~~ | CVD history at wave 4    | 0.783  | 0.000 |
| CVD history at wave 3    | ~~ | Stroke history at wave 4 | -0.020 | 0.000 |
| Stroke history at wave 3 | ~~ | Stroke history at wave 3 | 1.000  | 0.000 |
| Stroke history at wave 3 | ~~ | Age at wave 4            | 0.065  | 0.000 |
| Stroke history at wave 3 | ~~ | CVD history at wave 4    | 0.012  | 0.000 |
| Stroke history at wave 3 | ~~ | Stroke history at wave 4 | 0.807  | 0.000 |
| Age at wave 4            | ~~ | Age at wave 4            | 1.000  | 0.000 |
| Age at wave 4            | ~~ | CVD history at wave 4    | 0.061  | 0.000 |
| Age at wave 4            | ~~ | Stroke history at wave 4 | 0.030  | 0.000 |
| CVD history at wave 4    | ~~ | CVD history at wave 4    | 1.000  | 0.000 |
| CVD history at wave 4    | ~~ | Stroke history at wave 4 | -0.039 | 0.000 |
| Stroke history at wave 4 | ~~ | Stroke history at wave 4 | 1.000  | 0.000 |

LHS = Left-hand side (of the structural equation); RHS = right-hand side. The path column indicates the type of relationship between the two variables, ~ indicates a regression, and ~~ indicates a correlation or covariance.
